# Supplementary material for: Diverse strategies of O2 usage for preventing photo-oxidative damage under CO2 limitation during algal photosynthesis
Source: PubMed Central journal article supplement (PMC5247695; doi:10.1038/srep41022), 2017-01-20
Supplement: srep41022-s1.pdf [file srep41022-s1.pdf]

# Diverse strategies of O<sub>2</sub> usage for preventing photo-oxidative damage under CO<sub>2</sub> limitation during algal photosynthesis

Ginga Shimakawa; Yusuke Matsuda; Kensuke Nakajima; Masahiro Tamoi; Shigeru Shigeoka; Chikahiro Miyake

**Supplemental Table S1.** Effects of D-glucose on photosynthesis in secondary algae

|                            | Control                                                                                                         | 10 min in D-glucose | Control             | 10 min in D-glucose |
|----------------------------|-----------------------------------------------------------------------------------------------------------------|---------------------|---------------------|---------------------|
| <i>E. gracilis</i>         | <u><math>O_2</math> evolution rate / <math>\mu\text{mol } O_2 (\text{mg Chl})^{-1} \text{ h}^{-1}</math></u>    |                     | <u>Relative ETR</u> |                     |
| CO <sub>2</sub> saturation | 85 ± 2                                                                                                          | 86 ± 4              | 127 ± 3             | 127 ± 6             |
| CO <sub>2</sub> limitation | 8 ± 3                                                                                                           | 7.1 ± 0.8           | 69 ± 5              | 69 ± 4              |
| <i>P. tricornutum</i>      | <u><math>O_2</math> evolution rate / <math>\mu\text{mol } O_2 (\text{mg Chl } a)^{-1} \text{ h}^{-1}</math></u> |                     | <u>Relative ETR</u> |                     |
| CO <sub>2</sub> saturation | 127 ± 6                                                                                                         | 130 ± 2             | 136 ± 7             | 138 ± 3             |
| CO <sub>2</sub> limitation | 3.0 ± 1.5                                                                                                       | 3.1 ± 1.9           | 52 ± 3              | 50 ± 3              |

Final concentration of D-glucose is 5 mM. Control shows the data before D-glucose is added. Experiments under CO<sub>2</sub> saturation were conducted in the presence of 10 mM NaHCO<sub>3</sub>. Further, experiments were performed also under CO<sub>2</sub> limitation prepared by the analyses shown in Supplemental Fig. S6 and S7. All of the other experimental procedures are the same as those in Supplemental Fig. S6 and S7. Measurements were independently conducted three times, and the data are shown as means ± SD.

# Diverse strategies of O<sub>2</sub> usage for preventing photo-oxidative damage under CO<sub>2</sub> limitation during algal photosynthesis

Ginga Shimakawa; Yusuke Matsuda; Kensuke Nakajima; Masahiro Tamoi; Shigeru Shigeoka; Chikahiro Miyake

**Supplemental Table S2.** Nitrogen-based Chl contents in cyanobacterial and algal cells used in this study

|                              | <u>Chl content / mg Chl (mg N)<sup>-1</sup></u> |              |               |                                                   |
|------------------------------|-------------------------------------------------|--------------|---------------|---------------------------------------------------|
|                              | Total Chl                                       | Chl <i>a</i> | Chl <i>b</i>  | Chl <i>c</i> <sub>1</sub> + <i>c</i> <sub>2</sub> |
| <b>S. 7942</b>               | 0.19 ± 0.04                                     | 0.19 ± 0.04  | -             | -                                                 |
| <b><i>E. gracilis</i></b>    | 0.36 ± 0.03                                     | 0.32 ± 0.04  | 0.040 ± 0.014 | -                                                 |
| <b><i>P. tricornutum</i></b> | 0.34 ± 0.04                                     | 0.31 ± 0.04  | -             | 0.035 ± 0.003                                     |

Measurements were independently conducted three times, and the data are shown as means ± SD

# Diverse strategies of O<sub>2</sub> usage for preventing photo-oxidative damage under CO<sub>2</sub> limitation during algal photosynthesis

Ginga Shimakawa; Yusuke Matsuda; Kensuke Nakajima; Masahiro Tamoi; Shigeru Shigeoka; Chikahiro Miyake

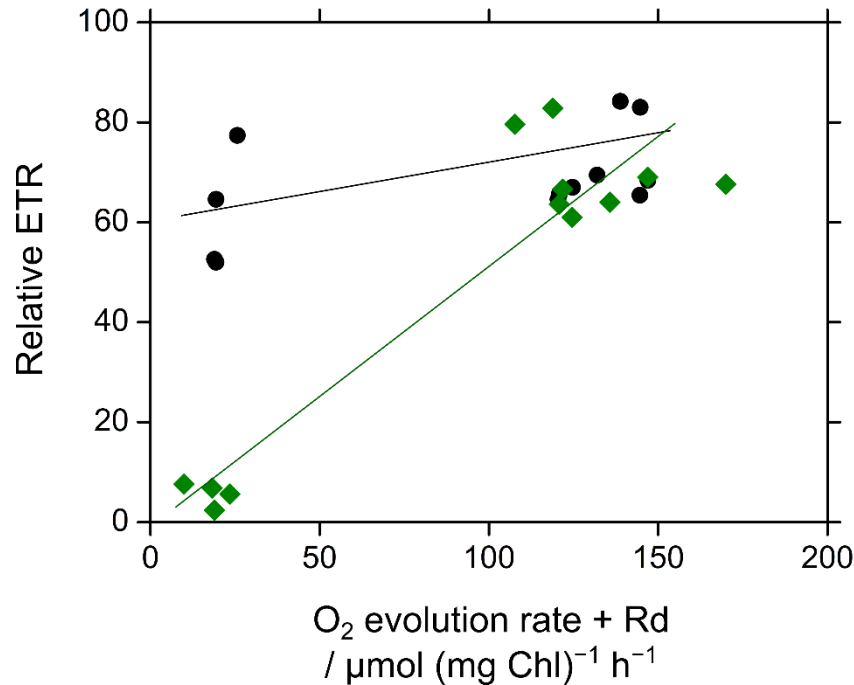

# Diverse strategies of O<sub>2</sub> usage for preventing photo-oxidative damage under CO<sub>2</sub> limitation during algal photosynthesis

Ginga Shimakawa; Yusuke Matsuda; Kensuke Nakajima; Masahiro Tamoi; Shigeru Shigeoka; Chikahiro Miyake

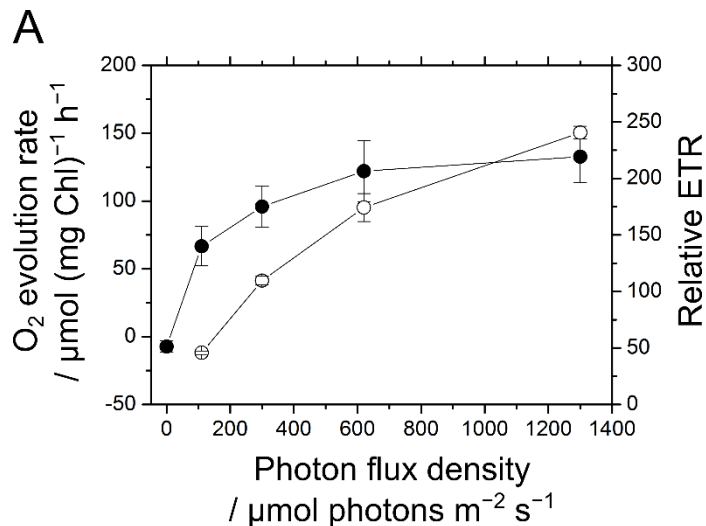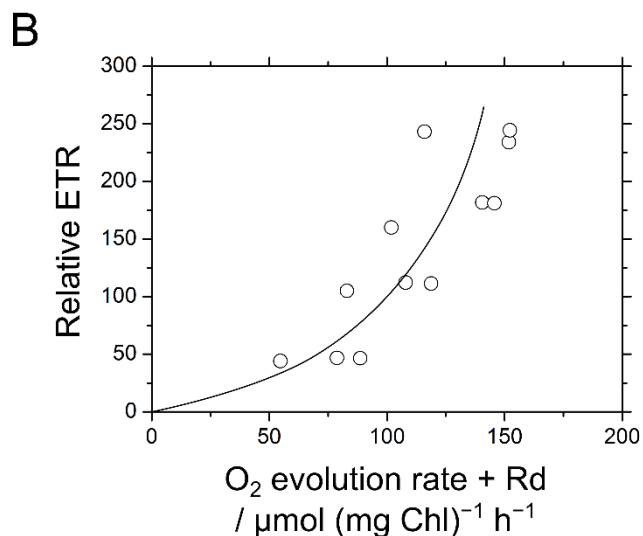

**Supplemental Figure S2.** Light-response curve of O<sub>2</sub> evolution rate and relative electron transport rate (ETR) during CO<sub>2</sub>-saturated photosynthesis in *S. 7942*. (A) Dependence of O<sub>2</sub> evolution rate (closed circles) and relative ETR (open circles) on photon flux density. Negative values show dark respiration rate (Rd). Reaction media contained cyanobacterial cells (10  $\mu\text{g Chl } a \text{ mL}^{-1}$ ) and NaHCO<sub>3</sub> (final concentration 10 mM). Measurements were independently taken three times, and the data are shown as means  $\pm$  SD. (B) The relationship between gross photosynthetic O<sub>2</sub> evolution rate (O<sub>2</sub> evolution rate + Rd) and relative ETR. Data were derived from Supplemental Fig. S2A.

Figure S2. Shimakawa et al.

# Diverse strategies of O<sub>2</sub> usage for preventing photo-oxidative damage under CO<sub>2</sub> limitation during algal photosynthesis

Ginga Shimakawa; Yusuke Matsuda; Kensuke Nakajima; Masahiro Tamoi; Shigeru Shigeoka; Chikahiro Miyake

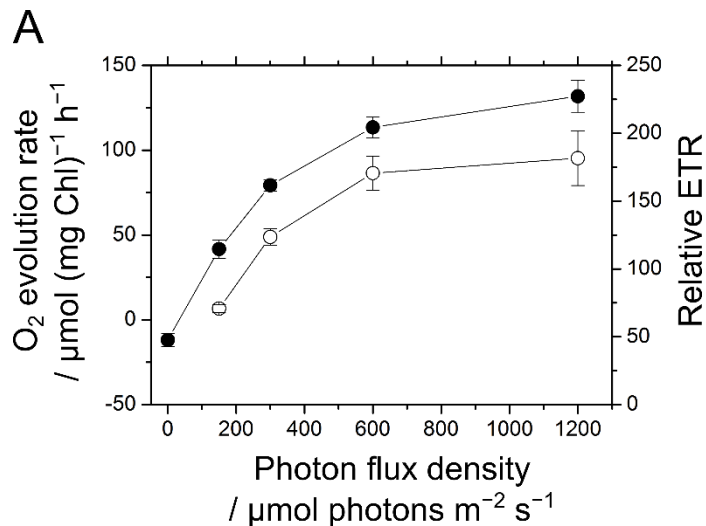

**Supplemental Figure S3.** Light-response curve of O<sub>2</sub> evolution rate and relative electron transport rate (ETR) during CO<sub>2</sub>-saturated photosynthesis in *Euglena gracilis*. (A) Dependence of O<sub>2</sub> evolution rate (closed circles) and relative ETR (open circles) on photon flux density. Negative values show dark respiration rate (R<sub>d</sub>). Reaction media contained cyanobacterial cells (10  $\mu\text{g Chl } a \text{ mL}^{-1}$ ) and NaHCO<sub>3</sub> (final concentration 10 mM). Measurements were independently taken three times, and the data are shown as means  $\pm$  SD. (B) The relationship between gross photosynthetic O<sub>2</sub> evolution rate (O<sub>2</sub> evolution rate + R<sub>d</sub>) and relative ETR. Data were derived from Supplemental Fig. S3A.

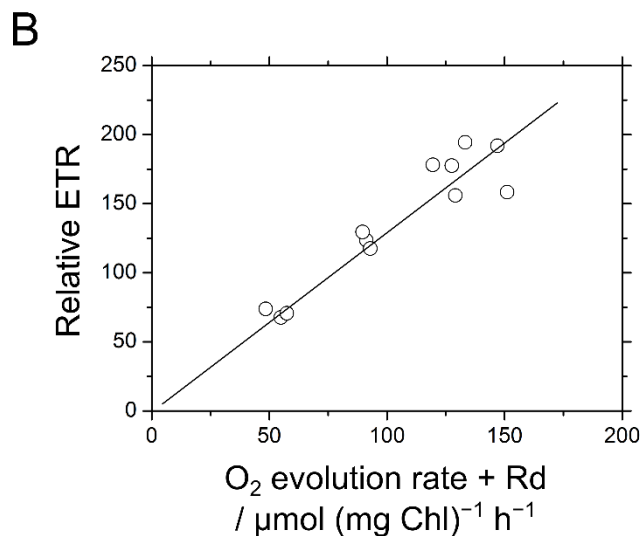

Figure S3. Shimakawa et al.

# Diverse strategies of O<sub>2</sub> usage for preventing photo-oxidative damage under CO<sub>2</sub> limitation during algal photosynthesis

Ginga Shimakawa; Yusuke Matsuda; Kensuke Nakajima; Masahiro Tamoi; Shigeru Shigeoka; Chikahiro Miyake

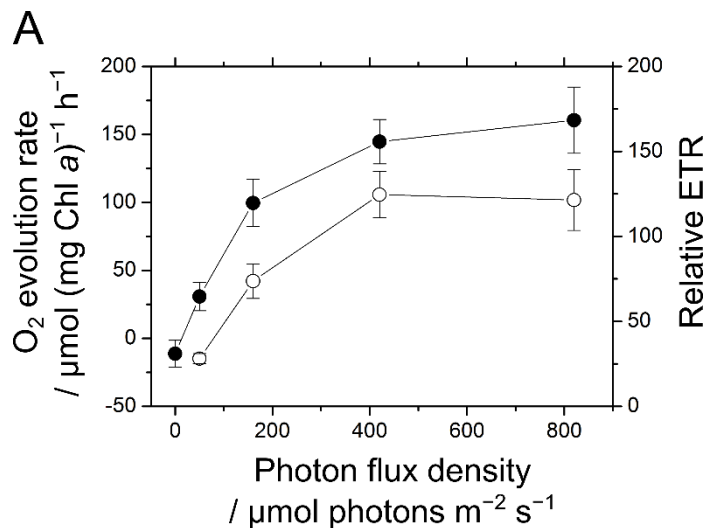

**Supplemental Figure S4.** Light-response curve of O<sub>2</sub> evolution rate and relative electron transport rate (ETR) during CO<sub>2</sub>-saturated photosynthesis in *Phaeodactylum tricornutum*. (A) Dependence of O<sub>2</sub> evolution rate (closed circles) and relative ETR (open circles) on photon flux density. Negative values show dark respiration rate (R<sub>d</sub>). Reaction media contained cyanobacterial cells (10  $\mu\text{g Chl } a \text{ mL}^{-1}$ ) and NaHCO<sub>3</sub> (final concentration 10 mM). Measurements were independently taken three times, and the data are shown as means  $\pm$  SD. (B) The relationship between gross photosynthetic O<sub>2</sub> evolution rate (O<sub>2</sub> evolution rate + R<sub>d</sub>) and relative ETR. Data were derived from Supplemental Fig. S4A.

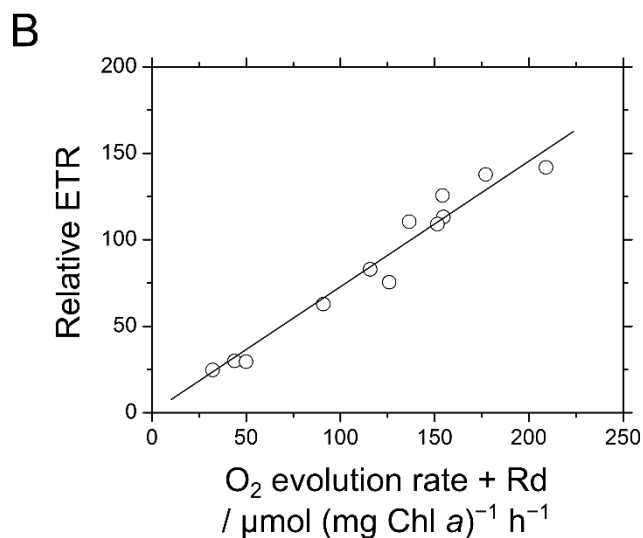

Figure S4. Shimakawa et al.

# Diverse strategies of O<sub>2</sub> usage for preventing photo-oxidative damage under CO<sub>2</sub> limitation during photosynthesis

Ginga Shimakawa; Yusuke Matsuda; Kensuke Nakajima; Masahiro Tamoi; Shigeru Shigeoka; Chikahiro Miyake

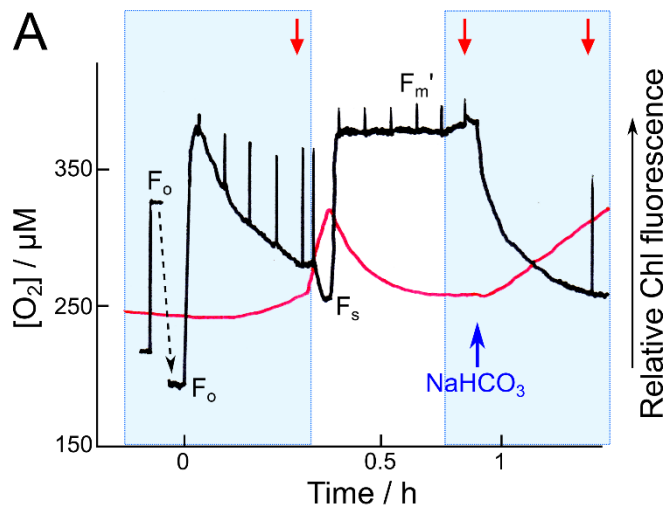

**Supplemental Figure S5.** Response of photosynthesis to CO<sub>2</sub> limitation in *S. 7942*. (A) Raw trace showing the time course of O<sub>2</sub> in the reaction media (red line) and relative Chlorophyll (Chl) fluorescence of the cells (black line). Illumination with white actinic light (AL) (300 μmol photons m<sup>-2</sup> s<sup>-1</sup>) began at 0. Chl fluorescence parameters had the usual definitions (F<sub>0</sub>, minimum fluorescence determined under ML; F<sub>s</sub>, steady-state fluorescence under AL; F<sub>m</sub>', maximum variable fluorescence under saturating light). Reaction media contained cyanobacterial cells (10 μg Chl *a* mL<sup>-1</sup>). NaHCO<sub>3</sub> (final concentration 10 mM) was added at the point indicated by blue arrow. Blue shading indicates that the top of the O<sub>2</sub> electrode chamber was closed and that the measurement time scales (*x*-axis) were reduced to 1/10. O<sub>2</sub> evolution rates were determined at the times indicated by red arrows. Measurements were taken three times and representative data are shown. (B) The relationship between gross photosynthetic O<sub>2</sub> evolution rate (net O<sub>2</sub> evolution rate + dark respiration rate [Rd]) and relative electron transport rate in the three independent measurements.

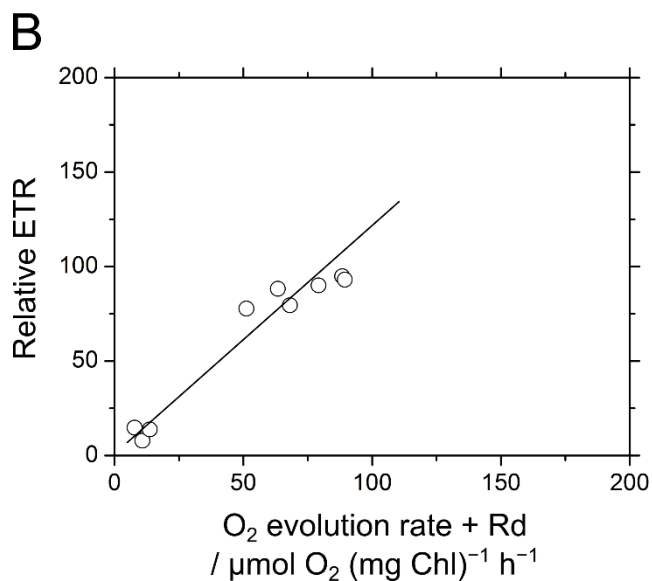

Figure S5. Shimakawa et al.

# Diverse strategies of O<sub>2</sub> usage for preventing photo-oxidative damage under CO<sub>2</sub> limitation during algal photosynthesis

Ginga Shimakawa; Yusuke Matsuda; Kensuke Nakajima; Masahiro Tamoi; Shigeru Shigeoka; Chikahiro Miyake

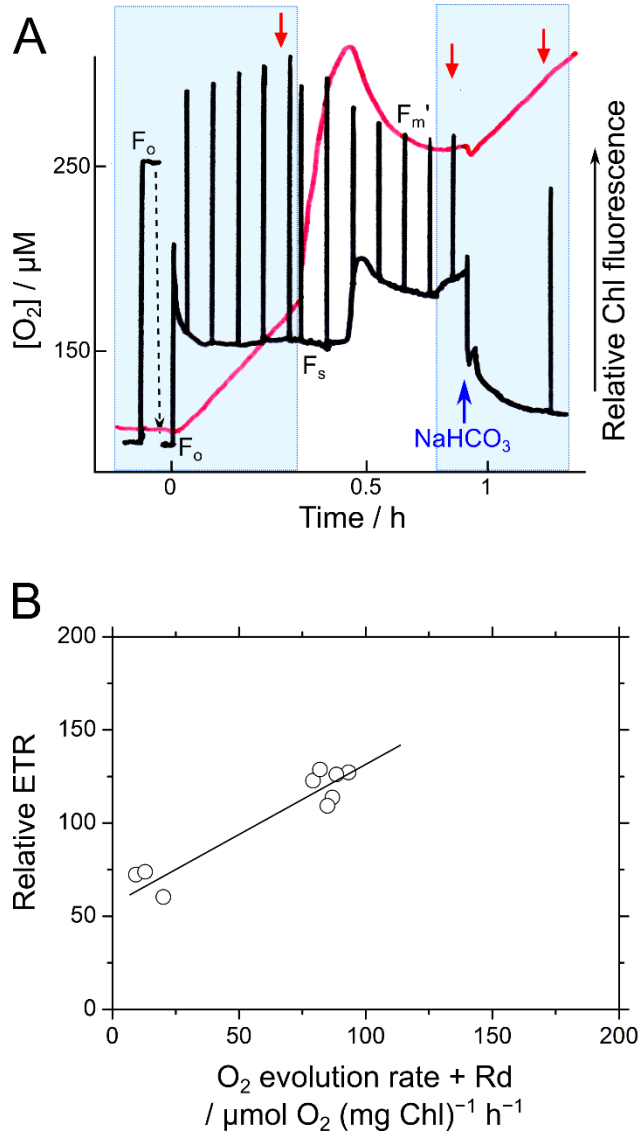

**Supplemental Figure S6.** Response of photosynthesis to CO<sub>2</sub> limitation in *Euglena gracilis*. (A) Raw trace showing the time course of O<sub>2</sub> in the reaction media (red line) and relative Chlorophyll (Chl) fluorescence of the cells (black line). Illumination with white actinic light (AL) (300 μmol photons m<sup>-2</sup> s<sup>-1</sup>) began at 0. Chl fluorescence parameters had the same definitions as described previously (see “Supplemental Figure S5”). Reaction media contained algal cells (10 μg Chl *a* mL<sup>-1</sup>). NaHCO<sub>3</sub> (final concentration 10 mM) was added at the point indicated by blue arrow. Blue shading indicates that the top of the O<sub>2</sub> electrode chamber was closed and that the measurement time scales (*x*-axis) were reduced to 1/10. O<sub>2</sub> evolution rates were determined at the times indicated by red arrows. Measurements were taken three times and representative data are shown. (B) The relationship between gross photosynthetic O<sub>2</sub> evolution rate (net O<sub>2</sub> evolution rate + dark respiration rate [Rd]) and relative electron transport rate in the three independent measurements.

Figure S6. Shimakawa et al.



# Diverse strategies of O<sub>2</sub> usage for preventing photo-oxidative damage under CO<sub>2</sub> limitation during photosynthesis

Ginga Shimakawa; Yusuke Matsuda; Kensuke Nakajima; Masahiro Tamoi; Shigeru Shigeoka; Chikahiro Miyake

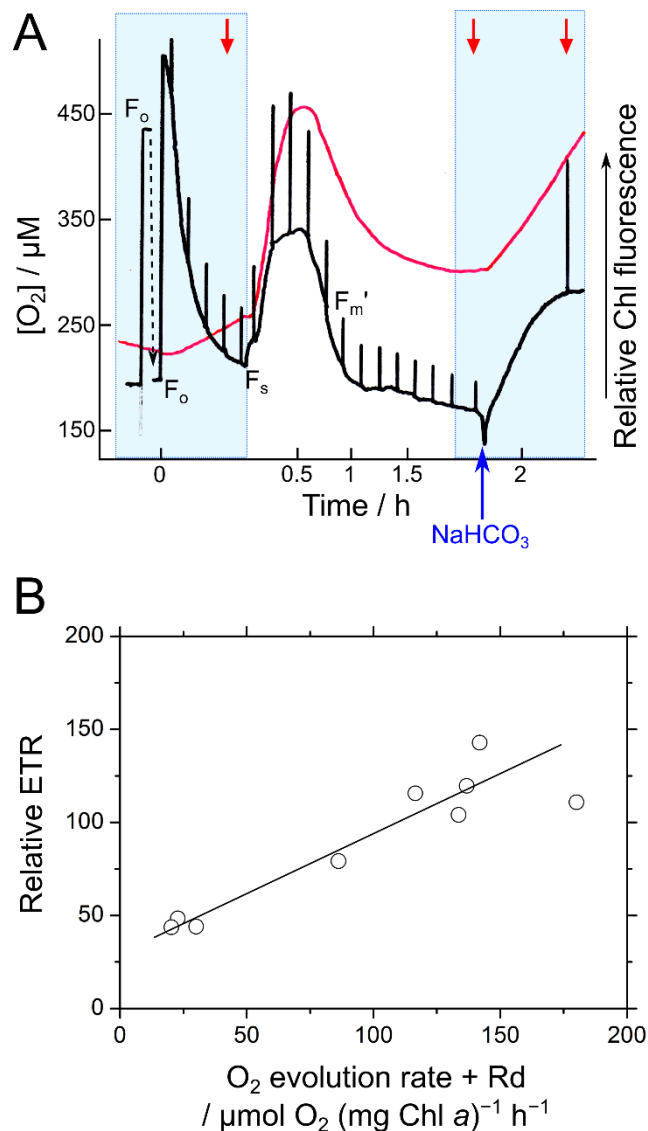

**Supplemental Figure S7.** Response of photosynthesis to CO<sub>2</sub> limitation in *Phaeodactylum tricornutum*. (A) Raw trace showing the time course of O<sub>2</sub> in the reaction media (red line) and relative Chlorophyll (Chl) fluorescence of the cells (black line). Illumination with white actinic light (AL) (300 μmol photons m<sup>-2</sup> s<sup>-1</sup>) began at 0. Chl fluorescence parameters had the same definitions as described previously (see “Supplemental Figure S5”). Reaction media contained algal cells (10 μg Chl *a* mL<sup>-1</sup>). NaHCO<sub>3</sub> (final concentration 10 mM) was added at the point indicated by blue arrow. Blue shading indicates that the top of the O<sub>2</sub> electrode chamber was closed and that the measurement time scales (*x*-axis) were reduced to 1/10. O<sub>2</sub> evolution rates were determined at the times indicated by red arrows. Measurements were taken three times and representative data are shown. (B) The relationship between gross photosynthetic O<sub>2</sub> evolution rate (net O<sub>2</sub> evolution rate + dark respiration rate [Rd]) and relative electron transport rate in the three independent measurements.

Figure S7. Shimakawa et al.

# Diverse strategies of O<sub>2</sub> usage for preventing photo-oxidative damage under CO<sub>2</sub> limitation during algal photosynthesis

Ginga Shimakawa; Yusuke Matsuda; Kensuke Nakajima; Masahiro Tamoi; Shigeru Shigeoka; Chikahiro Miyake

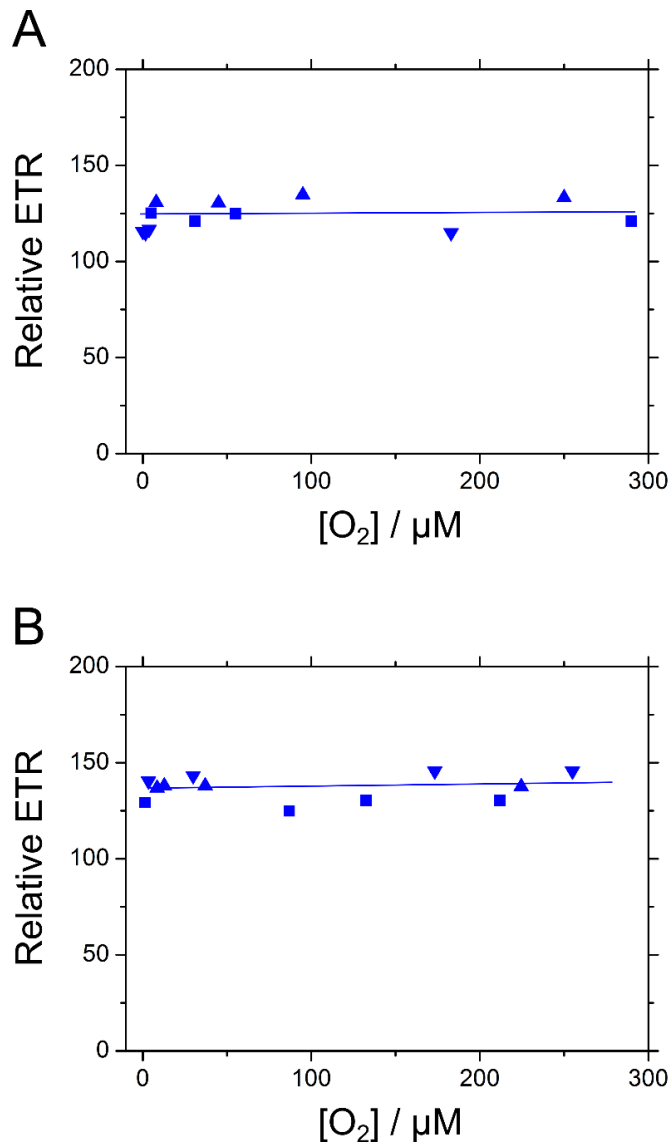

**Supplemental Figure S8.** Dependence of relative electron transport rate (ETR) on O<sub>2</sub> during CO<sub>2</sub>-saturated photosynthesis in *Euglena gracilis* (A) and *Phaeodactylum tricornutum* (B). To remove dissolved O<sub>2</sub>, D-glucose (5 mM), catalase (250 units mL<sup>-1</sup>), and glucose oxidase (5 units mL<sup>-1</sup>) was added to the fresh media containing the cells (10 μg Chl *a* mL<sup>-1</sup>). Photon flux densities of white actinic light (AL) were 300 μmol photons m<sup>-2</sup> s<sup>-1</sup> for *E. gracilis* and 400 μmol photons m<sup>-2</sup> s<sup>-1</sup> for *P. tricornutum*. CO<sub>2</sub>-saturated conditions were prepared in the presence of 10 mM NaHCO<sub>3</sub>. Triangles, inverse triangles, and squares represent three independent measurements, respectively.

Figure S8. Shimakawa et al.

# Diverse strategies of O<sub>2</sub> usage for preventing photo-oxidative damage under CO<sub>2</sub> limitation during algal photosynthesis

Ginga Shimakawa; Yusuke Matsuda; Kensuke Nakajima; Masahiro Tamoi; Shigeru Shigeoka; Chikahiro Miyake

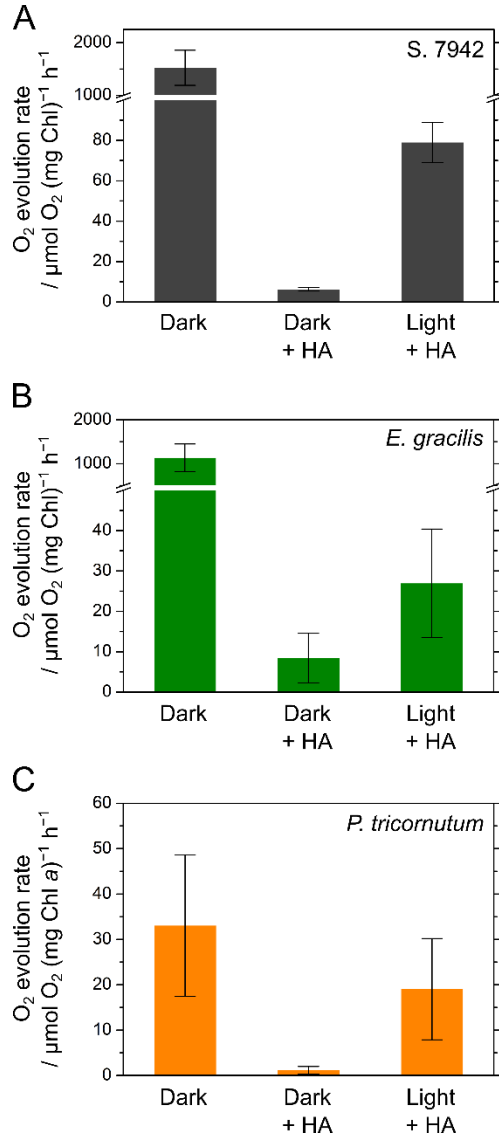

**Supplemental Figure S9.** H<sub>2</sub>O<sub>2</sub>-induced O<sub>2</sub> evolution in *S. 7942*, *Euglena gracilis*, and *Phaeodactylum tricornutum*. H<sub>2</sub>O<sub>2</sub> (0.5 mM) was added to the reaction media containing cyanobacterial or algal cells (10  $\mu\text{g Chl } a \text{ mL}^{-1}$ ) in the dark and during CO<sub>2</sub>-limited photosynthesis. Photon flux densities of white actinic light (AL) were 300  $\mu\text{mol photons m}^{-2} \text{ s}^{-1}$  for *E. gracilis* and 400  $\mu\text{mol photons m}^{-2} \text{ s}^{-1}$  for *P. tricornutum*. To exclude O<sub>2</sub> evolution by catalase reaction, we added hydroxylamine (HA) at 0.1 mM for *S. 7942* and *P. tricornutum*, and 0.5 mM for *E. gracilis*. For the measurements during CO<sub>2</sub>-limited photosynthesis, we added H<sub>2</sub>O<sub>2</sub> after photosynthetic O<sub>2</sub> evolution rate reduced to almost 0, with the top of the O<sub>2</sub> electrode chamber closed. Measurements were independently taken three times, and the data are shown as means  $\pm$  SD.

Figure S9. Shimakawa et al.
